# Supplementary material for: The polymerization of carvacrol catalyzed by Mn-porphyrins: obtaining the desired product guided by the choice of solvent, oxidant, and catalyst
Source: Royal Society of Chemistry journal article supplement (doi:10.1039/d2nj03171j), 2022-01-01
Supplement: d2nj03171j1.pdf [file d2nj03171j1.pdf]

# The polymerization of carvacrol catalyzed by Mn-porphyrins: obtaining the desired product guided by the choice of solvent, oxidant and catalyst

Patrícia Salvador Tessaro,<sup>[a]</sup> Alexandre Moreira Meireles,<sup>[a]</sup> Adriano Silva Guimarães,<sup>[a]</sup>  
Bernardo Schmitberger,<sup>[a]</sup> Ana Luísa Almeida Lage,<sup>[a]</sup> Patrícia Santiago de Oliveira Patrício,<sup>[b]</sup>  
Dayse Carvalho da Silva Martins,<sup>[a]</sup> and Gilson DeFreitas-Silva<sup>[a]\*</sup>

[a] P. S. Tessaro, A. M. Meireles, A. S. Guimarães, B. Schmitberger, A. L. A. Lage, D. C. S. Martins and G. DeFreitas-Silva

Departamento de Química – Instituto de Ciências Exatas – Universidade Federal de Minas Gerais

Belo Horizonte - MG, 31.270–901, Brazil

E-mail: gilsonufmg@ufmg.br

[b] P. S. O. Patrício

Departamento de Química – Centro Federal de Educação Tecnológica de Minas Gerais

Belo Horizonte – MG, 30.421-169, Brazil

## Supplementary Information

|                                                                                                                                                  |           |
|--------------------------------------------------------------------------------------------------------------------------------------------------|-----------|
| <b>1.0. Mass balance for carvacrol oxidation reactions .....</b>                                                                                 | <b>2</b>  |
| <b>2.0. Time dependence of carvacrol conversion in the PhIO/Cat1 system in dimethyl carbonate as solvent .....</b>                               | <b>3</b>  |
| <b>3.0. UV-Vis monitoring of carvacrol oxidation reaction by Cat2/PhIO system in dichloromethane .....</b>                                       | <b>4</b>  |
| <b>4.0. Mass spectrometry analysis of the Cat1/PhI(OAc)<sub>2</sub>/BHT/Carvacrol system.....</b>                                                | <b>5</b>  |
| <b>5.0. Carvacrol oxidation reactions in the presence of mannitol and sodium azide (NaN<sub>3</sub>) as radical scavengers<sup>a</sup> .....</b> | <b>6</b>  |
| <b>6.0. Oxidation of carvacrol using non-porphyrin compounds as catalysts.....</b>                                                               | <b>7</b>  |
| <b>7.0. Carvacrol's polymer characterization.....</b>                                                                                            | <b>10</b> |
| <b>8.0. References.....</b>                                                                                                                      | <b>14</b> |

## 1.0. Mass balance for carvacrol oxidation reactions

By the data obtained in the oxidation of carvacrol in the control systems or the catalyst/oxidation systems, the oxidation reactions lead to high conversion values with low yields for the products.

Minority products (thymoquinone or other oxidation products) were formed representing a small part of the initial substrate area. To carry out the mass balance, it was considered that the polymerization and/or oligomerization reaction is taking place, forming chemical species with high molar mass, here they are referred to as products not detectable (PND) by gas chromatography. These species were quantified by comparing the chromatographic peak areas of products to the consumed substrate:

$$A_{\text{PND}} = A_0 - \sum A_{\text{rp}}$$

$A_0$  = Initial substrate area

$\sum A_{\text{rp}}$  = Sum of reaction product areas including minority products.

**2.0. Time dependence of carvacrol conversion in the PhIO/Cat1 system in dimethyl carbonate as solvent**

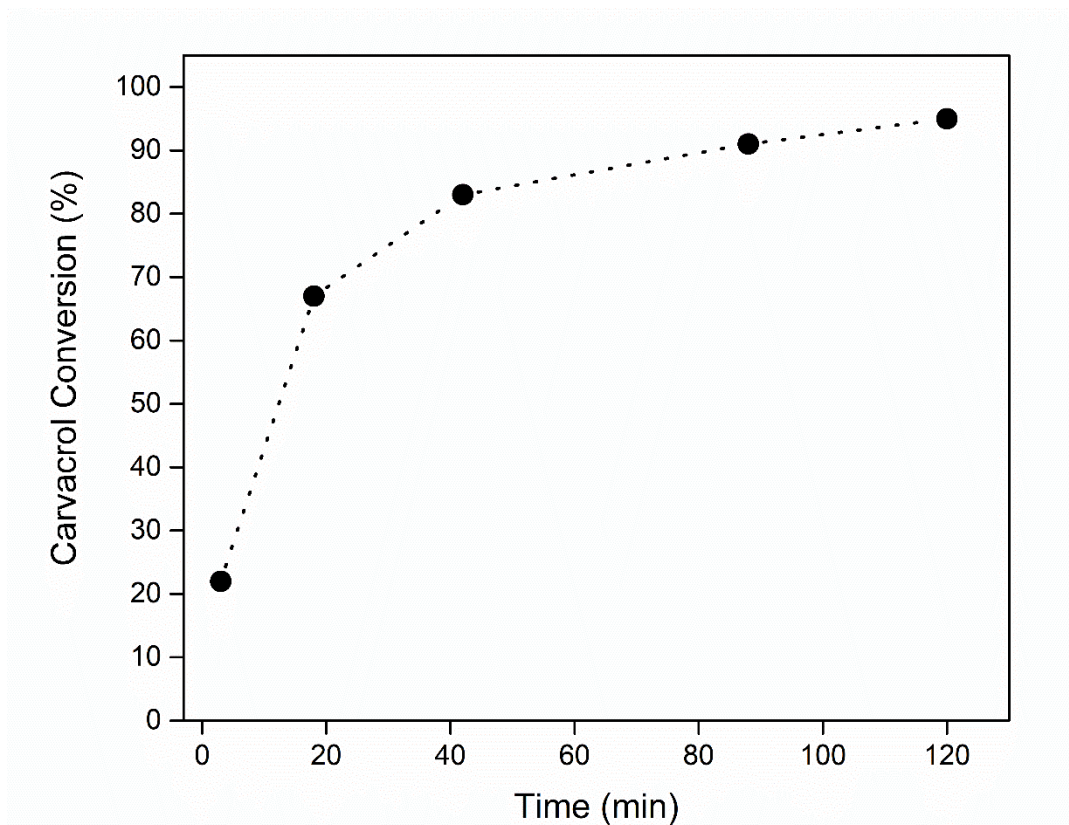

**Figure S1.** Follow-up of carvacrol oxidation by PhIO catalyzed by (Cat1) in dimethyl carbonate.

Cat1 =  $2.0 \times 10^{-6}$  mol; PhIO = Carvacrol =  $2.0 \times 10^{-5}$  mol; 25 °C; magnetic stirring.

### 3.0. UV-Vis monitoring of carvacrol oxidation reaction by Cat2/PhIO system in dichloromethane

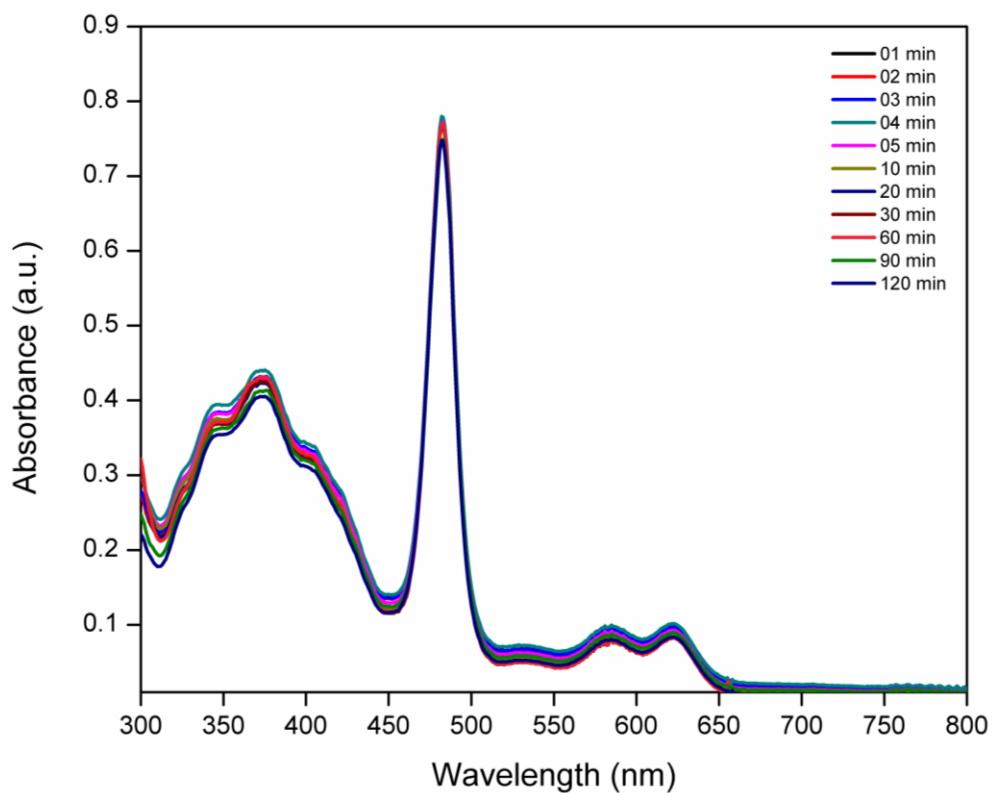

**Figure S2.** Evolution of the UV–Vis absorption spectrum of the carvacrol oxidation catalyzed by **Cat2** in the presence of PhIO and dichloromethane.

#### 4.0. Mass spectrometry analysis of the Cat1/PhI(OAc)<sub>2</sub>/BHT/Carvacrol system

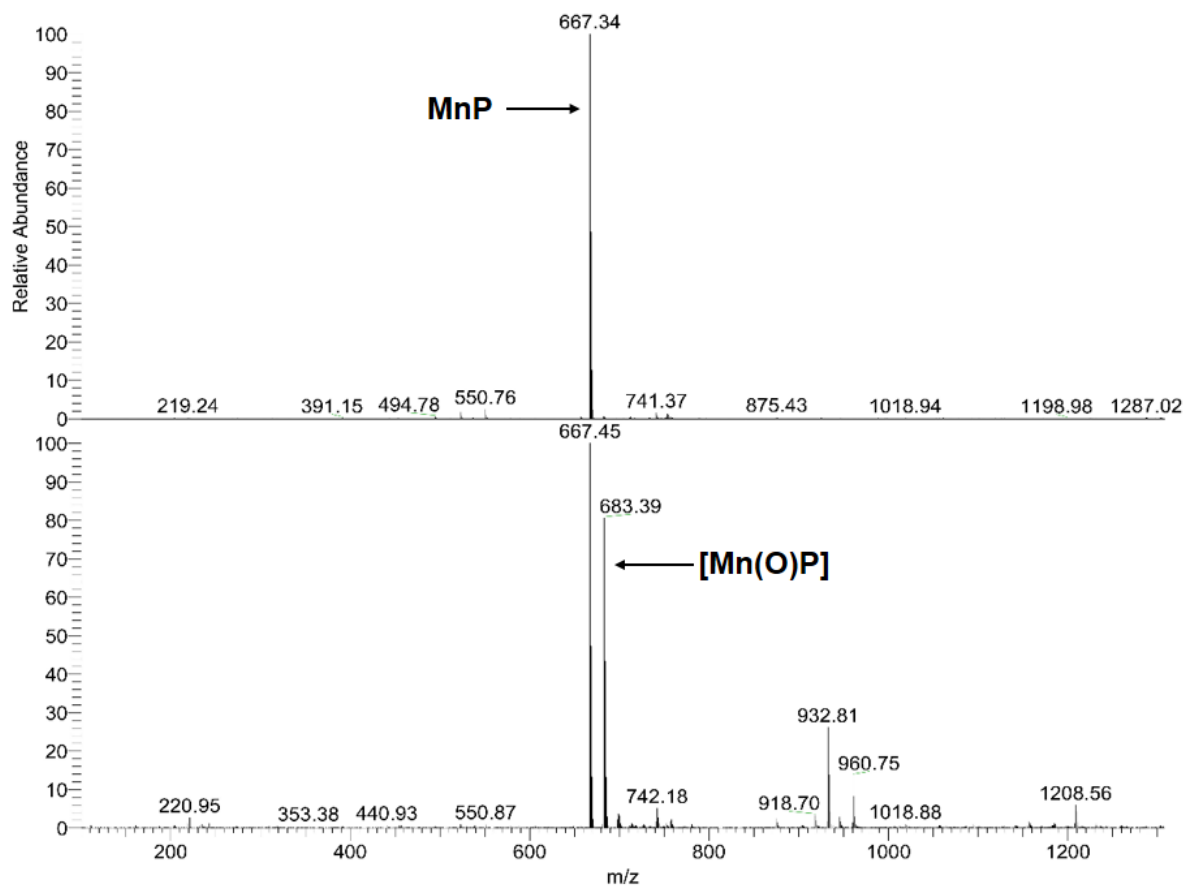

**Figure S3.** Mass spectrometry analysis of the (a) **Cat1** ( $m/z = 667.34$ ;  $[\text{Mn}^{\text{III}}(\text{TPP})]^+$ ) and (b) Cat1/PhI(OAc)<sub>2</sub>/BHT/Carvacrol system ( $m/z = 667.45$   $[\text{Mn}^{\text{III}}(\text{TPP})]^+$ ; and  $m/z = 683.39$   $[\text{Mn}^{\text{V}}(\text{O})\text{P}]^+$ ).

## 5.0. Carvacrol oxidation reactions in the presence of mannitol and sodium azide (NaN<sub>3</sub>) as radical scavengers<sup>a</sup>

**Table S1.** Carvacrol oxidation reactions by PhI(OAc)<sub>2</sub> and PhIO in the presence of mannitol or NaN<sub>3</sub> as radical scavengers, in dichloromethane.

| Entry | System                                                      | Carvacrol conversion (%) <sup>b</sup> | Entry | System                                   | Carvacrol conversion (%) <sup>b</sup> |
|-------|-------------------------------------------------------------|---------------------------------------|-------|------------------------------------------|---------------------------------------|
| 1     | PhI(OAc) <sub>2</sub> /Mannitol <sup>c</sup>                | 98                                    | 9     | PhIO/Mannitol <sup>c</sup>               | 100                                   |
| 2     | PhI(OAc) <sub>2</sub> / <b>Cat1</b> /Mannitol               | 100                                   | 10    | PhIO/ <b>Cat1</b> /Mannitol              | 100                                   |
| 3     | PhI(OAc) <sub>2</sub> / <b>Cat2</b> /Mannitol               | 99                                    | 11    | PhIO/ <b>Cat2</b> /Mannitol              | 100                                   |
| 4     | PhI(OAc) <sub>2</sub> /MnCl <sub>2</sub> /Mannitol          | 99                                    | 12    | PhIO/MnCl <sub>2</sub> /Mannitol         | 100                                   |
| 5     | PhI(OAc) <sub>2</sub> /NaN <sub>3</sub> <sup>c</sup>        | 100                                   | 13    | PhIO/NaN <sub>3</sub> <sup>c</sup>       | 100                                   |
| 6     | PhI(OAc) <sub>2</sub> / <b>Cat1</b> / NaN <sub>3</sub>      | 100                                   | 14    | PhIO/ <b>Cat1</b> /NaN <sub>3</sub>      | 100                                   |
| 7     | PhI(OAc) <sub>2</sub> / <b>Cat2</b> / NaN <sub>3</sub>      | 100                                   | 15    | PhIO/ <b>Cat2</b> /NaN <sub>3</sub>      | 100                                   |
| 8     | PhI(OAc) <sub>2</sub> /MnCl <sub>2</sub> / NaN <sub>3</sub> | 98                                    | 16    | PhIO/MnCl <sub>2</sub> /NaN <sub>3</sub> | 100                                   |

<sup>a</sup> Conditions: **Cat1** or **Cat2** or MnCl<sub>2</sub> = 2 × 10<sup>-6</sup> mol, PhIO or PhI(OAc)<sub>2</sub> = Carvacrol = radical scavenger = 2 × 10<sup>-5</sup> mol; 25 °C; magnetic stirring; 120 minutes.

<sup>b</sup> Substrate-based values.

<sup>c</sup> Reactions were carried out in the absence of the catalyst.

**6.0. Table S2. Oxidation of carvacrol using non-porphyrin compounds as catalysts.**

| Experiment       | Catalyst                                 | [catalyst] / mM | [carvacrol] / mM | Oxidant ([oxidant] / mM)             | Solvent | Temp. (°C)        | Time (h) | Carvacrol conversion (%) | Thymoquinone yield (%)  | Other products                                            | Reference        |
|------------------|------------------------------------------|-----------------|------------------|--------------------------------------|---------|-------------------|----------|--------------------------|-------------------------|-----------------------------------------------------------|------------------|
| 1 <sup>a</sup>   | Fe(III) phthalocyanine                   | 0.005           | -                | KHSO <sub>5</sub> (0.15)             | ACN     | 25                | 1        | 94                       | 63.3                    | Non indicated                                             | Milos (2001)[1]  |
| 2 <sup>a,b</sup> | Fe(III) phthalocyanine                   | 0.005           | -                | KHSO <sub>5</sub> (0.15)             | ACN     | 25                | 1        | 96                       | 65.1                    | Non indicated                                             | Milos (2001)[1]  |
| 3 <sup>a</sup>   | Fe(III) phthalocyanine                   | 0.005           | -                | H <sub>2</sub> O <sub>2</sub> (0.15) | ACN     | 25                | 3        | 36                       | 19.1                    | Non indicated                                             | Milos (2001)[1]  |
| 4 <sup>a,b</sup> | Fe(III) phthalocyanine                   | 0.005           | -                | H <sub>2</sub> O <sub>2</sub> (0.15) | ACN     | 25                | 3        | 39                       | 23.6                    | Non indicated                                             | Milos (2001)[1]  |
| 5                | Keggin-type tungstoborates <sup>c1</sup> | 0.012           | 3                | H <sub>2</sub> O <sub>2</sub> (9.8)  | ACN     | ~ 82 <sup>d</sup> | 4        | ~ 35                     | < 5                     | Benzoquinones as main products                            | Santos (2003)[2] |
| 6                | Keggin-type tungstoborates <sup>c2</sup> | 0.012           | 3                | H <sub>2</sub> O <sub>2</sub> (9.8)  | ACN     | ~ 82 <sup>d</sup> | 4        | Similar to experiment 5  | Similar to experiment 5 | Similar to experiment 5                                   | Santos (2003)[2] |
| 7                | Cr(salpn)-NaY                            | -               | 29               | H <sub>2</sub> O <sub>2</sub> (29)   | ACN     | 60                | 5        | 14.2                     | 13.0                    | Thymoquinones, thymohydroquinone, and other benzoquinones | Günes (2006)[3]  |
| 8                | Cr(salpn)-NaY                            | -               | 29               | H <sub>2</sub> O <sub>2</sub> (87)   | ACN     | 60                | 5        | 23.5                     | 17.6                    | Thymoquinones, thymohydroquinone, and other benzoquinones | Günes (2006)[3]  |
| 9                | Fe(salpn)-NaY                            | -               | 29               | H <sub>2</sub> O <sub>2</sub> (29)   | ACN     | 60                | 5        | 12.7                     | 11.6                    | Thymoquinones, thymohydroquinone,                         | Günes (2006)[3]  |

|    |                        |     |     |                                    |                          |                 |     |      |      |                                                                     |                 |
|----|------------------------|-----|-----|------------------------------------|--------------------------|-----------------|-----|------|------|---------------------------------------------------------------------|-----------------|
|    |                        |     |     |                                    |                          |                 |     |      |      | and other benzoquinones                                             |                 |
| 10 | Fe(salpn)-NaY          | -   | 29  | H <sub>2</sub> O <sub>2</sub> (87) | ACN                      | 60              | 5   | 27.6 | 22.0 | Thymoquinones, thymohydroquinone, and other benzoquinones           | Günes (2006)[3] |
| 11 | Zn(salpn)-NaY          | -   | 29  | H <sub>2</sub> O <sub>2</sub> (29) | ACN                      | 60              | 5   | 11.0 | 11.0 | Thymoquinones, thymohydroquinone, and other benzoquinones           | Günes (2006)[3] |
| 12 | Zn(salpn)-NaY          | -   | 29  | H <sub>2</sub> O <sub>2</sub> (87) | ACN                      | 60              | 5   | 6.7  | 6.7  | Thymoquinones, thymohydroquinone, and other benzoquinones           | Günes (2006)[3] |
| 13 | Ni(salpn)-NaY          | -   | 29  | H <sub>2</sub> O <sub>2</sub> (29) | ACN                      | 60              | 5   | 7.9  | 7.9  | Thymoquinones, thymohydroquinone, and other benzoquinones           | Günes (2006)[3] |
| 14 | Ni(salpn)-NaY          | -   | 29  | H <sub>2</sub> O <sub>2</sub> (87) | ACN                      | 60              | 5   | 5.9  | 5.9  | Thymoquinones, thymohydroquinone, and other benzoquinones           | Günes (2006)[3] |
| 15 | Bi(salpn)-NaY          | -   | 29  | H <sub>2</sub> O <sub>2</sub> (29) | ACN                      | 60              | 5   | 3.2  | 3.2  | Thymoquinones, thymohydroquinone, and other benzoquinones           | Günes (2006)[3] |
| 16 | Bi(salpn)-NaY          | -   | 29  | H <sub>2</sub> O <sub>2</sub> (87) | ACN                      | 60              | 5   | 4.9  | 4.9  | Thymoquinones, thymohydroquinone, and other benzoquinones           | Günes (2006)[3] |
| 17 | Fe(III) phthalocyanine | 1.0 | 0.3 | KHSO <sub>5</sub> (1.2)            | Methanol:Water (8:1 v/v) | RT <sup>e</sup> | 0.5 | 100  | 19.7 | Poly(5-isopropyl-2-methyl-1,3-phenylene oxide) (Polymer) and others | Günay (2016)[4] |



|    |                           |     |      |                             |                             |                 |     |      |      |                                                                                |                    |
|----|---------------------------|-----|------|-----------------------------|-----------------------------|-----------------|-----|------|------|--------------------------------------------------------------------------------|--------------------|
| 18 | Fe(III)<br>phthalocyanine | 1.0 | 0.3  | KHSO <sub>5</sub><br>(0.9)  | Methanol:Water<br>(8:1 v/v) | RT <sup>e</sup> | 0.5 | 99.6 | 26.3 | Poly(5-<br>isopropyl-2-methyl-<br>1,3-phenylene oxide)<br>(Polymer) and others | Günay<br>(2016)[4] |
| 19 | Fe(III)<br>phthalocyanine | 1.0 | 0.3  | KHSO <sub>5</sub><br>(0.6)  | Methanol:Water<br>(8:1 v/v) | RT <sup>e</sup> | 0.5 | 99.0 | 31.3 | Poly(5-<br>isopropyl-2-methyl-<br>1,3-phenylene oxide)<br>(Polymer) and others | Günay<br>(2016)[4] |
| 20 | Fe(III)<br>phthalocyanine | 1.0 | 0.3  | KHSO <sub>5</sub><br>(0.45) | Methanol:Water<br>(8:1 v/v) | RT <sup>e</sup> | 0.5 | 94.3 | 24.3 | Poly(5-<br>isopropyl-2-methyl-<br>1,3-phenylene oxide)<br>(Polymer) and others | Günay<br>(2016)[4] |
| 21 | Fe(III)<br>phthalocyanine | 1.0 | 0.3  | KHSO <sub>5</sub><br>(0.3)  | Methanol:Water<br>(8:1 v/v) | RT <sup>e</sup> | 0.5 | 82.0 | 12.7 | Poly(5-<br>isopropyl-2-methyl-<br>1,3-phenylene oxide)<br>(Polymer) and others | Günay<br>(2016)[4] |
| 22 | Fe(III)<br>phthalocyanine | 0.5 | 0.3  | KHSO <sub>5</sub><br>(0.6)  | Methanol:Water<br>(8:1 v/v) | RT <sup>e</sup> | 0.5 | 96.0 | 32.3 | Poly(5-<br>isopropyl-2-methyl-<br>1,3-phenylene oxide)<br>(Polymer) and others | Günay<br>(2016)[4] |
| 23 | Fe(III)<br>phthalocyanine | 1.0 | 0.15 | KHSO <sub>5</sub><br>(0.6)  | Methanol:Water<br>(8:1 v/v) | RT <sup>e</sup> | 0.5 | 98.9 | 30   | Poly(5-<br>isopropyl-2-methyl-<br>1,3-phenylene oxide)<br>(Polymer) and others | Günay<br>(2016)[4] |
| 24 | Fe(III)<br>phthalocyanine | 1.0 | 0.45 | KHSO <sub>5</sub><br>(0.6)  | Methanol:Water<br>(8:1 v/v) | RT <sup>e</sup> | 0.5 | 92.4 | 21.3 | Poly(5-<br>isopropyl-2-methyl-<br>1,3-phenylene oxide)<br>(Polymer) and others | Günay<br>(2016)[4] |
| 25 | Fe(III)<br>phthalocyanine | 1.0 | 0.6  | KHSO <sub>5</sub><br>(0.6)  | Methanol:Water<br>(8:1 v/v) | RT <sup>e</sup> | 0.5 | 60.0 | 10.5 | Poly(5-<br>isopropyl-2-methyl-<br>1,3-phenylene oxide)<br>(Polymer) and others | Günay<br>(2016)[4] |

<sup>a</sup> Carvacrol was oxidated in an oregano essential oil. <sup>b</sup> Co-catalyst CH<sub>3</sub>COONH<sub>4</sub> added.

<sup>c1</sup> (TBA)<sub>4</sub>H<sub>2</sub>[Mn(H<sub>2</sub>O)BW<sub>11</sub>O<sub>39</sub>]·H<sub>2</sub>O, <sup>c2</sup> (HDTMA)<sub>4</sub>H<sub>2</sub>[Mn(H<sub>2</sub>O)BW<sub>11</sub>O<sub>39</sub>]·10H<sub>2</sub>O. <sup>d</sup> Reflux conditions. <sup>e</sup> Room temperature (RT).

## 7.0. Carvacrol's polymer characterization

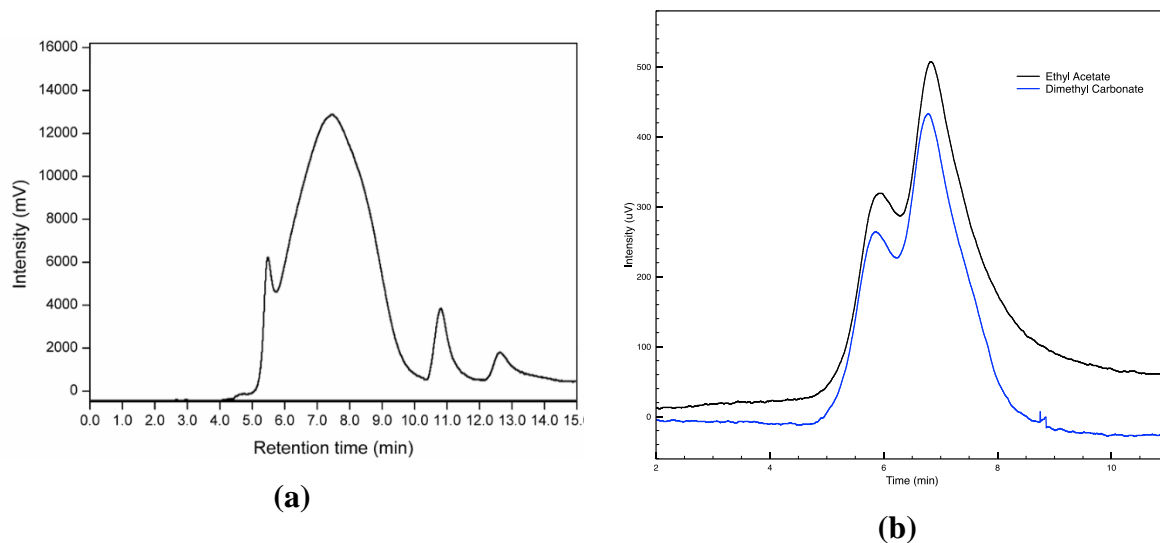

**Figure S4.** GPC chromatogram of the synthesized polymer. (a) Dichloromethane. (b) Ethyl acetate (black line) and dimethyl carbonate (blue line).

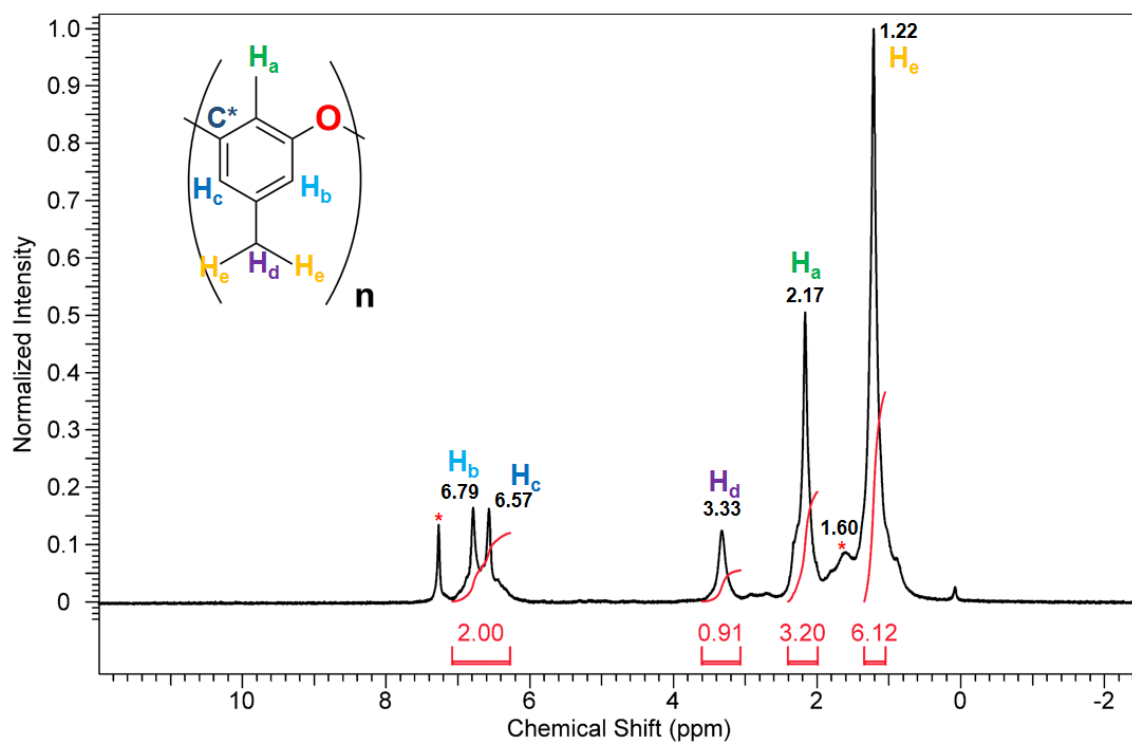

**Figure S5.**  $^1\text{H}$  NMR spectrum of carvacrol's polymer in  $\text{CDCl}_3$  (400 MHz, TMS) at 25 °C. The signals assigned with \* are referent to the non-deuterated solvent and/or impurities of the solvent.

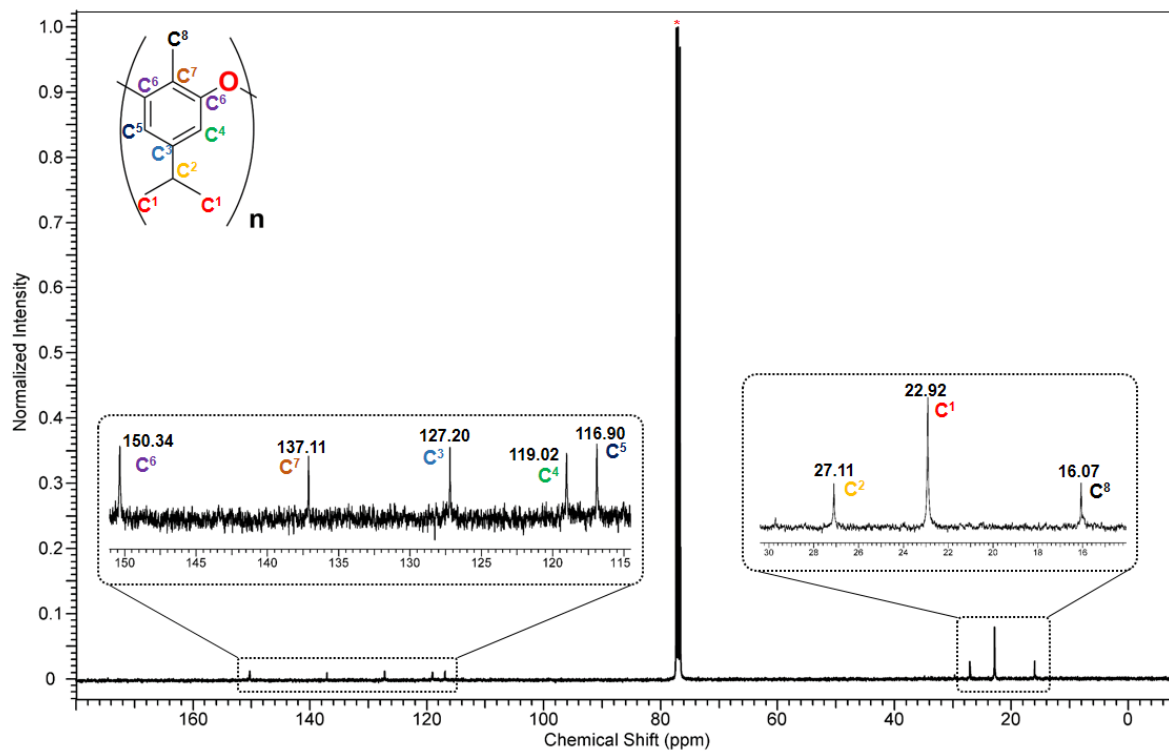

**Figure S6.**  $^{13}\text{C}$  NMR spectrum of carvacrol's polymer in  $\text{CDCl}_3$  (400 MHz, TMS) at 25 °C. The signals assigned with \* are referent to the non-deuterated solvent.

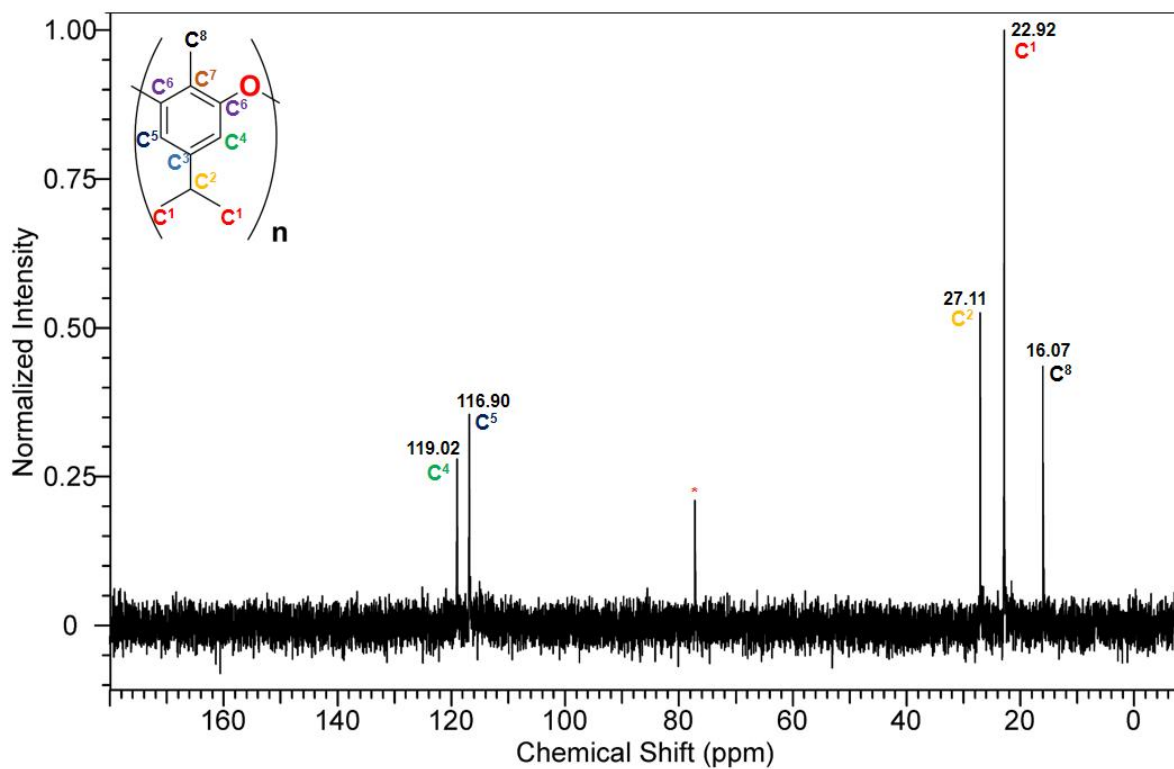

**Figure S7.** DEPT-135 spectrum of carvacrol's polymer in  $\text{CDCl}_3$  (400 MHz, TMS) at 25 °C. The signals assigned with \* are referent to the non-deuterated solvent.

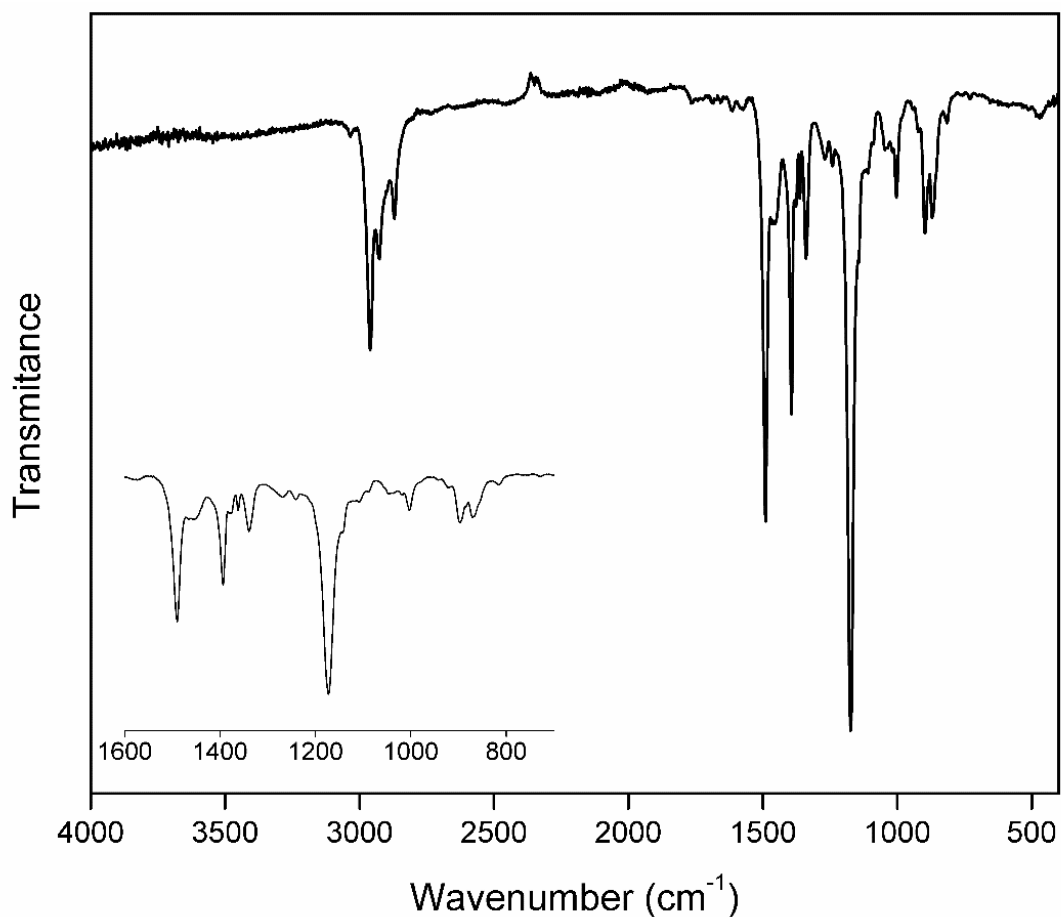

**Figure S8.** FTIR-ATR spectrum from carvacrol's polymer.

**Table S3.** Functional groups and vibration modes from polymer associated to bands by FTIR.

| Wavenumber (cm <sup>-1</sup> ) | Vibration Mode                                          | Intensity |
|--------------------------------|---------------------------------------------------------|-----------|
| 2964                           | ν C-H symmetric and asymmetric                          | medium    |
| 2924                           |                                                         |           |
| 2871                           |                                                         |           |
| 1602                           | ν C=C (aromatic ring)                                   | weak      |
| 1573                           |                                                         | weak      |
| 1487                           |                                                         | strong    |
| 1388                           | δ C-H (isopropyl methyl group)                          | strong    |
| 1360                           |                                                         | medium    |
| 1173                           | δ R <sub>2</sub> C=CH <sub>2</sub> (1:2:5-substitution) | strong    |
| 996                            |                                                         | medium    |
| 896                            |                                                         | strong    |
| 863                            | δ C-H bending                                           | strong    |
| 810                            | δ C-H out-of-plane (aromatic ring)                      | weak      |

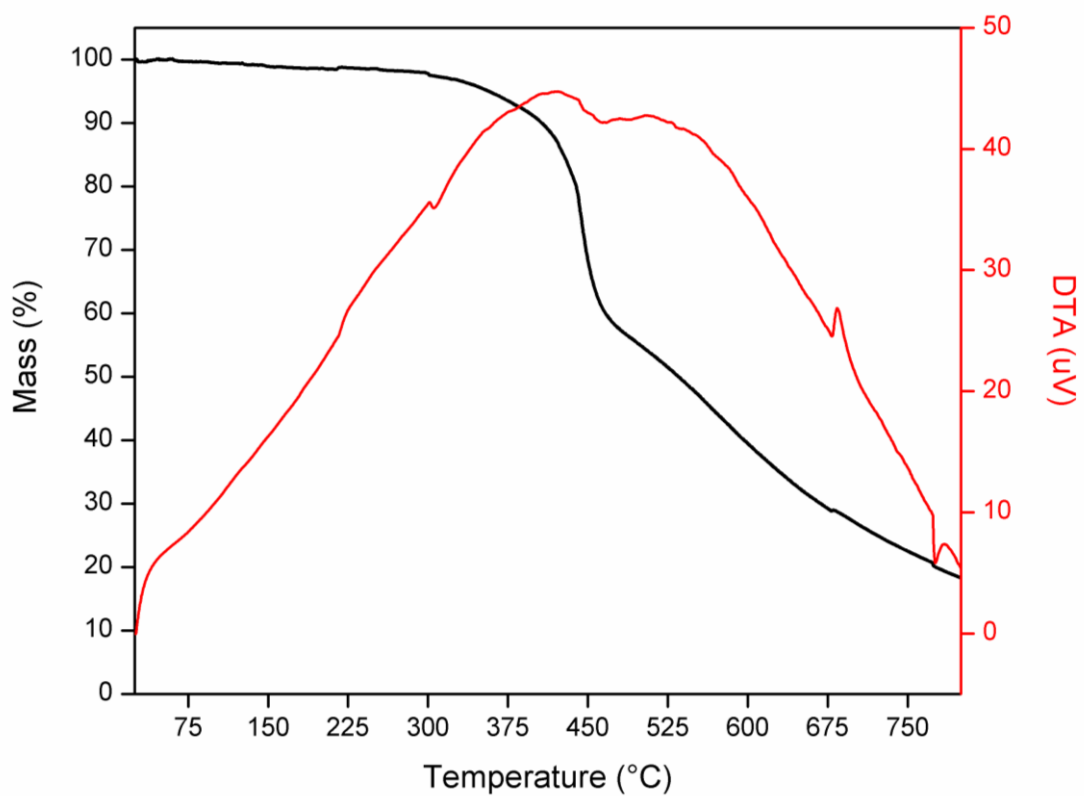

**Figure S9.** TG curve from carvacrol's polymer, under N<sub>2</sub> atmosphere at a heating rate of 10 °C min<sup>-1</sup>.

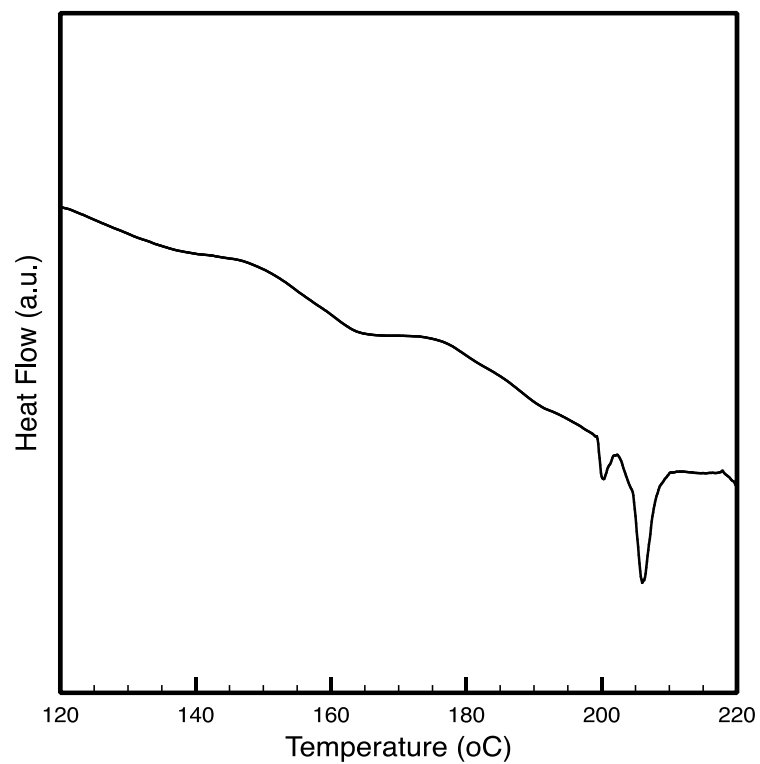

**Figure S10.** DSC curve (2<sup>nd</sup> run) from carvacrol's polymer.

## 8.0. References

- [1] M. Milos, *Applied Catalysis A: General*, 2001, 216, 157–161. [https://doi.org/10.1016/S0926-860X\(01\)00560-9](https://doi.org/10.1016/S0926-860X(01)00560-9).
- [2] I. C. M. S. Santos, M. M. Q. Simões, M. M. M. S. Pereira, R. R. L. Martins, M. G. P. M. S. Neves, J. A. S. Cavaleiro, and A. M. V. Cavaleiro, *Journal of Molecular Catalysis A: Chemical*, 2003, 195, 253–262. [https://doi.org/10.1016/S1381-1169\(02\)00582-4](https://doi.org/10.1016/S1381-1169(02)00582-4).
- [3] A. Güneş, O. Bayraktar, and S. Yılmaz, *Industrial & Engineering Chemistry Research*, 2006, 45, 54–61. <https://doi.org/10.1021/ie050185o>.
- [4] T. Günay, Y. Çimen, R. B. Karabacak, and H. Türk, *Catalysis Letters*, 2016, 146, 2306–2312. <https://doi.org/10.1007/s10562-016-1850-2>.
